# Supplementary material for: The effect of wrist posture on extrinsic finger muscle activity during single joint movements
Source: PubMed Central journal article supplement (PMC7239904; doi:10.1038/s41598-020-65167-x), 2020-05-20
Supplement: 41598_2020_65167_MOESM1_ESM.pdf [file 41598_2020_65167_MOESM1_ESM.pdf]

## **The effect of wrist posture on extrinsic finger muscle activity during single joint movements**

Carl R. Beringer\*<sup>1,2,3</sup>, Misagh Mansouri<sup>1,4</sup>, Lee E. Fisher<sup>1,2,3,4</sup>, Jennifer L. Collinger<sup>1,2,3,4,5</sup>, Michael C. Munin<sup>4</sup>,  
Michael L. Boninger<sup>1,2,4,5,6</sup>, Robert A. Gaunt\*<sup>1,2,3,4</sup>

<sup>1</sup>Rehab Neural Engineering Labs, University of Pittsburgh, Pittsburgh, PA 15213, USA

<sup>2</sup>Department of Bioengineering, University of Pittsburgh, Pittsburgh, PA 15213, USA

<sup>3</sup>Center for the Neural Basis of Cognition, Pittsburgh, PA 15213, USA

<sup>4</sup>Department of Physical Medicine and Rehabilitation, University of Pittsburgh, PA 15213

<sup>5</sup>Department of Veterans Affairs, Pittsburgh, PA 15206, USA

<sup>6</sup>McGowan Institute for Regenerative Medicine, University of Pittsburgh, Pittsburgh, PA 15219, USA

Correspondence to: Robert Gaunt rag53@pitt.edu

## Supplementary Tables

**Supplementary Table 1:** List of movements performed for each subject. For trial types 1-30 the wrist posture column indicates the static wrist posture for the entire trial, while the finger posture column indicates the position of the other fingers during the movement. For trial types 31-42 the wrist posture column indicates the wrist rotation posture for the entire trial, while the finger posture column indicates the position of all the fingers during the movement.

| <b>Trial #</b> | <b>Movement</b>        | <b>Wrist Posture</b> | <b>Finger Posture</b> |
|----------------|------------------------|----------------------|-----------------------|
| 1              | D2 Flexion/Extension   | Neutral              | Extended              |
| 2              | D3 Flexion/Extension   | Neutral              | Extended              |
| 3              | D4 Flexion/Extension   | Neutral              | Extended              |
| 4              | D5 Flexion/Extension   | Neutral              | Extended              |
| 5              | D1 Flexion/Extension   | Neutral              | Extended              |
| 6              | D1 Abduction/Adduction | Neutral              | Extended              |
| 7              | D2 Flexion/Extension   | Flexed               | Extended              |
| 8              | D3 Flexion/Extension   | Flexed               | Extended              |
| 9              | D4 Flexion/Extension   | Flexed               | Extended              |
| 10             | D5 Flexion/Extension   | Flexed               | Extended              |
| 11             | D1 Flexion/Extension   | Flexed               | Extended              |
| 12             | D1 Abduction/Adduction | Flexed               | Extended              |
| 13             | D2 Flexion/Extension   | Extended             | Extended              |
| 14             | D3 Flexion/Extension   | Extended             | Extended              |
| 15             | D4 Flexion/Extension   | Extended             | Extended              |
| 16             | D5 Flexion/Extension   | Extended             | Extended              |
| 17             | D1 Flexion/Extension   | Extended             | Extended              |
| 18             | D1 Abduction/Adduction | Extended             | Extended              |
| 19             | D2 Flexion/Extension   | Pronated             | Extended              |
| 20             | D3 Flexion/Extension   | Pronated             | Extended              |
| 21             | D4 Flexion/Extension   | Pronated             | Extended              |
| 22             | D5 Flexion/Extension   | Pronated             | Extended              |

|    |                           |           |          |
|----|---------------------------|-----------|----------|
| 23 | D1 Flexion/Extension      | Pronated  | Extended |
| 24 | D1 Abduction/Adduction    | Pronated  | Extended |
| 25 | D2 Flexion/Extension      | Supinated | Extended |
| 26 | D3 Flexion/Extension      | Supinated | Extended |
| 27 | D4 Flexion/Extension      | Supinated | Extended |
| 28 | D5 Flexion/Extension      | Supinated | Extended |
| 29 | D1 Flexion/Extension      | Supinated | Extended |
| 30 | D1 Abduction/Adduction    | Supinated | Extended |
| 31 | Wrist Flexion/Extension   | Neutral   | Flexed   |
| 32 | Wrist Flexion/Extension   | Pronated  | Flexed   |
| 33 | Wrist Flexion/Extension   | Supinated | Flexed   |
| 34 | Wrist Flexion/Extension   | Neutral   | Extended |
| 35 | Wrist Flexion/Extension   | Pronated  | Extended |
| 36 | Wrist Flexion/Extension   | Supinated | Extended |
| 37 | Wrist Abduction/Adduction | Neutral   | Flexed   |
| 38 | Wrist Abduction/Adduction | Pronated  | Flexed   |
| 39 | Wrist Abduction/Adduction | Supinated | Flexed   |
| 40 | Wrist Abduction/Adduction | Neutral   | Extended |
| 41 | Wrist Abduction/Adduction | Pronated  | Extended |
| 42 | Wrist Abduction/Adduction | Supinated | Extended |
